# Supplementary material for: Anlotinib Plus Camrelizumab And Chemotherapy As First-Line Treatment In Patients With Advanced Esophageal Squamous Cell Carcinoma
Source: Research Square preprint supplement (doi:10.21203/rs.3.rs-5211269/v1), 2025-05-06
Supplement: Supplementary file 1 [file 085a717f3f37bddf9e0cc489.docx]

eTable 5 Surgical Patient Safety Data

| Perioperative parameters | | TCAC  n (%) | TCC  n (%) |
| --- | --- | --- | --- |
| No. of patients | | 10 | 2 |
| Complications during and within 30 days after surgery | Anastomotic fistula | 3(30) | 1(50) |
| Anastomotic bleeding | 0 | 0 |
| Other | 1(10) | 0 |
| Perioperative mortality | | 0 | 0 |
