# Supplementary material for: Anlotinib Plus Camrelizumab And Chemotherapy As First-Line Treatment In Patients With Advanced Esophageal Squamous Cell Carcinoma
Source: Research Square preprint supplement (doi:10.21203/rs.3.rs-5211269/v1), 2025-05-06
Supplement: Supplementary file 2 [file 0937e4bd4f7d1c31a7c5195b.docx]

eTable 4 Resectability Assessment at Initial Diagnosis and Final Surgical Outcomes

| Surgical Indications and Operative Outcomes | TCAC (n=30) | TCC (n=30) |
| --- | --- | --- |
| Initially anatomically unresectable → Converted to resectable with subsequent surgery | 10 | 2 |
| Initially anatomically unresectable → No surgery received | 16 | 23 |
| Initially unresectable due to complications →No surgery/radiotherapy received | 4 | 5 |
