# Supplementary material for: Anlotinib Plus Camrelizumab And Chemotherapy As First-Line Treatment In Patients With Advanced Esophageal Squamous Cell Carcinoma
Source: Research Square preprint supplement (doi:10.21203/rs.3.rs-5211269/v1), 2025-05-06
Supplement: Supplementary file 3 [file 3f1faa951697c4b66f86ae85.docx]

eTable 8 subsequent treatment information

| Subsequent Treatments After First-Line Therapy | | TCAC n (%) | TCC n (%) |
| --- | --- | --- | --- |
| PD | | 16 | 27 |
| 2L | | 10(62.5) | 20(74.1) |
| 2Ltreatment regimens | Anlo+Chemo+PD-1 | 5(31.2) | 11(40.7) |
|  | Chemo+PD-1 | 3(18.8) | 5(18.5) |
|  | Chemo | 2(12.5) | 4(14.8) |
| ≥3L | | 5(31.3) | 118(40.7) |
| Anlo | | 5(31.2) | 9(33.3) |
| Radiotherapy | | 3(18.8) | 4(14.8) |

PD,Progressive disease. 2L,Second-line treatment.3L,Third line treatment. Anlo, Anlotinib. Chemo, Chemotherapy. PD-1, PD-1 antibody.
