# Supplementary material for: Anlotinib Plus Camrelizumab And Chemotherapy As First-Line Treatment In Patients With Advanced Esophageal Squamous Cell Carcinoma
Source: Research Square preprint supplement (doi:10.21203/rs.3.rs-5211269/v1), 2025-05-06
Supplement: Supplementary file 4 [file 691429fbf3f4535ed6e25dab.docx]

eTable 2 Dysphagia Classification

| LEVEL | DETAILS |
| --- | --- |
| 0 | Ability to eat solid foods without paying particular attention to bite size or chewing |
| 1 | Able to swallow solid food in chunks less than 18mm in diameter and chew thoroughly |
| 2 | Ability to swallow semi-solid food (like baby food) |
| 3 | Liquid intake only |
| 4 | Inability to swallow liquids or saliva |
