# Supplementary material for: Anlotinib Plus Camrelizumab And Chemotherapy As First-Line Treatment In Patients With Advanced Esophageal Squamous Cell Carcinoma
Source: Research Square preprint supplement (doi:10.21203/rs.3.rs-5211269/v1), 2025-05-06
Supplement: Supplementary file 5 [file 7eeeff370f2fe1851bc831a4.docx]

eTable 6 Results of Logistic Regression Analysis for Objective Response Rate

| **Variable** | **Univariate Analysis** | |  | **Multivariate Analysis** | |
| --- | --- | --- | --- | --- | --- |
| **HR (95% CI)** | ***P*** |  | **HR (95% CI)** | ***P*** |
| Group |  |  |  |  |  |
| TCAC |  |  |  |  |  |
| TCC | 11.769 (2.919-47.458) | 0.001 |  | 30.250(3.348-273.347) | 0.002 |
| Age |  |  |  | - | - |
| >65 |  |  |  |  |  |
| ≤65 | 1.000 (0.342-2.926) | 1.000 |  |  |  |
| Sex |  |  |  | - | - |
| Male |  |  |  |  |  |
| Female | 1.000 (0.261-3.826) | 1.000 |  |  |  |
| Clinical stages |  |  |  | - | - |
| III |  |  |  |  |  |
| IVA | 0.725(0.187-2.809) | 0.642 |  |  |  |
| IVB | 1.055(0.284-3.923) | 0.936 |  |  |  |
| T-category |  |  |  | - | - |
| ≤T3 |  |  |  |  |  |
| T4 | 1.400(0.443-4.425) | 0.567 |  |  |  |
| N-category |  |  |  | - | - |
| ≤N1 |  |  |  |  |  |
| N2 | 0.917(0.212-3.961) | 0.907 |  |  |  |
| N3 | 1.056(0.278-4.010) | 0.937 |  |  |  |
| M-category |  |  |  | - | - |
| M1 |  |  |  |  |  |
| M0 | 1.114(0.364-3.415) | 0.850 |  |  |  |
| Location |  |  |  | - | - |
| Cervical+ UT |  |  |  |  |  |
| MT | 4.667(0.830-26.238) | 0.080 |  |  |  |
| LT | 3.500(0.897-13.663) | 0.071 |  |  |  |
| No. of organs with metastases |  |  |  |  |  |
| 1 |  |  |  |  |  |
| ≥2 | 3.414(0.677-17.205) | 0.137 |  |  |  |
| PDL1 CPS |  |  |  | - | - |
| ≥10 |  |  |  |  |  |
| <10 | 1.000(0.219-4.564) | 1.000 |  |  |  |
| Paclitaxel type |  |  |  | - | - |
| Albumin Bound |  |  |  |  |  |
| Solvent-Based | 3.500(1.140-10.742) | .0290 |  |  |  |
| Smoking |  |  |  | - | - |
| YES |  |  |  |  |  |
| NO | 0.808 (0.265-2.464) | 0.707 |  |  |  |
| Drinking |  |  |  | - | - |
| YES |  |  |  |  |  |
| NO | 1.105 (0.378-3.235) | 0.855 |  |  |  |
| Dysphagia score |  |  |  | - | - |
| 0-1 |  |  |  |  |  |
| 2-4 | 0.778 (0.230-2.627) | 0.686 |  |  |  |
| SCC |  |  |  | - | - |
| ≥ULN |  |  |  |  |  |
| <ULN | 1.581 (0.725-3.444) | 0.249 |  |  |  |
| LDH |  |  |  | - | - |
| ≥ULN |  |  |  |  |  |
| <ULN | 2.094 (0.527-8.327) | 0.294 |  |  |  |
| ALB |  |  |  | - | - |
| <ULN |  |  |  |  |  |
| ≥ULN | 1.093 (0.397-3.008) | 0.863 |  |  |  |

Univariate analysis uses the enter method, while multivariable analysis employs the Forward: LR method. Abbreviation: UT, Upper thoracic; MT, Middle thoracic; LT, Lowerthoracic; ULN, Upper Limit of Normal; SCC, Squamous Cell Carcinoma Antigen; ALB, Albumin; LDH, Lactate Dehydrogenase
