# Supplementary material for: Anlotinib Plus Camrelizumab And Chemotherapy As First-Line Treatment In Patients With Advanced Esophageal Squamous Cell Carcinoma
Source: Research Square preprint supplement (doi:10.21203/rs.3.rs-5211269/v1), 2025-05-06
Supplement: Supplementary file 6 [file 8c32b45175ea7d38cbda56ae.xlsx]

## Sheet: Sheet1
eTable 3 Detailed Information of Surgical Patients
ID	Group	姓名	住院号	电话	Sex	Age	Smoking	Drinking	TNM	Clinical stage	No of treatment cycles	Time from enrollment to surgery (m)	pCR	Clinical remission depth of target lesion	Optimal efficacy of target lesion	Overall optimal efficacy	确诊日期	第一次用药时间	疗程	Metastatic site	Recurrence	PFS(m)	Death	OS(m)	Reasons for not undergoing surgery at initial diagnosis	Anastomotic fistula	Anastomotic bleeding	Other surgical complications
a07	TCAC	宴兴全	b67208	13902471506	Male	66	Yes	No	T3N2M0	III	2	2.86667	Yes	-0.611111	CR	PR	20211027	20210425	2	Lymph node	No	2.86667	No	2.86667	Unresectable locally advanced due to the close relationship with the bronchi	No	No	No
a16	TCAC	黄珍武	c23665	18682858127	Male	51	Yes	Yes	T3N3M0	IVA	4	4.33333	No	-0.61435	CR	PR	20220407	20220414	4	Lymph node	No	4.33333	No	4.33333	Unresectable locally advanced due to N3	No	No	No
a21	TCAC	朱生彪	C29268	13667670927	Male	62	No	No	T3N3M0	IVA	3	3.9	Yes	-0.416244	PR	PR	20220511	20220520	3	Lymph node	No	3.9	No	3.9	Unresectable locally advanced due to N3	No	No	No
a22	TCAC	谭建	C29337	15013738775	Male	67	Yes	Yes	T3N2M1	IVB	2	2.03333	No	-0.359477	PR	PR	20220513	20220521	2	Lung,Lymph node	No	2.03333	No	2.03333	Metastatic	No	No	No
a24	TCAC	孙中喜	C31356	13048339262	Male	55	Yes	Yes	T3N2M0	III	3	3	No	-0.771739	CR	PR	20220525	20220602	3	Lymph node	No	3	No	3	Unresectable locally advanced due to the close relationship with the descending aorta	Yes	No	No
a25	TCAC	刘朝美	C31909	13996473889	Female	62	No	Yes	T2N2M0	III	2	3.33333	No	-0.312057	CR	PR	20220526	20220608	2	Lymph node	No	3.33333	No	3.33333	Unresectable locally advanced due to the close relationship with the bronchi	No	No	No
a28	TCAC	邓常见	C33677	18682680909	Male	66	No	Yes	T3N2M1	IVB	3	3.03333	Yes	-0.331325	PR	PR	20220621	20220624	3	Adrenal gland,Lymph node	No	3.03333	No	3.03333	Metastatic	No	No	No
a29	TCAC	刘远柱	C34915	15085580988	Male	56	Yes	No	T3N2M0	III	2	2.76667	No	-0.32381	PR	PR	20220616	20220625	2	Lymph node	No	2.76667	No	2.76667	Unresectable locally advanced due to the close relationship with the descending aorta	Yes	No	No
a30	TCAC	毛际轩	C38182	13368480618	Male	47	Yes	Yes	T3N2M1	IVB	6	5.06667	Yes	-1	CR	CR	20220715	20220715	5	Liver,Lymph node	No	5.06667	No	5.06667	Metastatic	No	No	No
a31	TCAC	王月娥	C40563	15334522862	Female	60	No	No	T3N2M1	IVB	4	10.2	Yes	-1	CR	CR	20220728	20220729	4	Liver,Lymph node	No	10.2	No	10.2	Metastatic	Yes	No	No
c15	TCC	李玉英	A82060	13340735628	Female	56	No	No	T4N2M0	IVA	2	1.9	No	-0.0297619	SD	SD	20210619	20210624	2	Lymph node	No	1.9	No	1.9	Unresectable locally advanced due to the close relationship with the bronchi and descending aorta	No	No	No
c20	TCC	涂光荣	C31456	13310244776	Male	55	No	No	T3N2M0	III	2	2	Yes	-1	CR	CR	20220605	2022060	2	Lymph node	No	2	No	2	Unresectable locally advanced due to the close relationship with the bronchi	Yes	No	No
