# Supplementary material for: Anlotinib Plus Camrelizumab And Chemotherapy As First-Line Treatment In Patients With Advanced Esophageal Squamous Cell Carcinoma
Source: Research Square preprint supplement (doi:10.21203/rs.3.rs-5211269/v1), 2025-05-06
Supplement: Supplementary file 7 [file 96629981dfb6de68bea4f0c0.docx]

eTable 1 Drug Information

| DRUG | COMPANY |
| --- | --- |
| Camrelizumab | Jiangsu Hengrui Medicine Co.,Ltd. |
| Paclitaxel | Yangzijiang Pharmaceutical Group Co., Ltd |
| Albumin-Bound Paclitaxel | Jiangsu Hengrui Pharmaceutical Co.,Ltd. |
| Cisplatin | Jiangsu Haosen Pharmaceutical Group Co.,Ltd. |
| Carboplatin | Qilu Pharmaceutical Co., Ltd. |
| Anlotinib | Chia Tai Tianqing Pharmaceutical Group Co.,Ltd. |
