# Supplementary material for: Anlotinib Plus Camrelizumab And Chemotherapy As First-Line Treatment In Patients With Advanced Esophageal Squamous Cell Carcinoma
Source: Research Square preprint supplement (doi:10.21203/rs.3.rs-5211269/v1), 2025-05-06
Supplement: Supplementary file 8 [file bc0cbc4c2d6958a752b72b8f.docx]

eTable 7 Results of Cox Regression Analysis for Progression-Free Survival

| **Variable** | **Univariate Analysis** | |  | **Multivariate Analysis** | |
| --- | --- | --- | --- | --- | --- |
| **HR (95% CI)** | ***P*** |  | **HR (95% CI)** | ***P*** |
| Group |  |  |  |  |  |
| TCAC |  |  |  |  |  |
| TCC | 0.233 (0.112–0.487) | <0.001 |  | 0.385 (0.177– 0.837) | 0.016 |
| Age |  |  |  | - | - |
| >65 |  |  |  |  |  |
| ≤65 | 0.677 (0.346–1.322) | 0.253 |  |  |  |
| Sex |  |  |  | - | - |
| Male |  |  |  |  |  |
| Female | 1.895 (0.668–5.373) | 0.230 |  |  |  |
| Clinical stages |  |  |  | - | - |
| III |  |  |  |  |  |
| IVA | 0.823(.0373-1.818) | 0.630 |  |  |  |
| IVB | 1.526(0.743-3.133) | 0.249 |  |  |  |
| T-category |  |  |  | - | - |
| ≤T3 |  |  |  |  |  |
| T4 | 1.105 (0.598-2.039) | 0.751 |  |  |  |
| N-category |  |  |  | - | - |
| ≤N1 |  |  |  |  |  |
| N2 | 1.196（0.636-2.251） | 0.578 |  |  |  |
| N3 | 0.822（0.453-1.493） | 0.520 |  |  |  |
| M-category |  |  |  | - | - |
| M1 |  |  |  |  |  |
| M0 | 0.746 (0.397-1.399) | 0.361 |  |  |  |
| Location |  |  |  | - | - |
| Cervical+ UT |  |  |  |  |  |
| MT | 0.736（0.526-1.896） | 0.529 |  |  |  |
| LT | 0.865（0.866-1.803） | 0.132 |  |  |  |
| No. of organs with metastases |  |  |  |  |  |
| 1 |  |  |  |  |  |
| ≥2 | 0.717 (0.331-1.555) | 0.400 |  |  |  |
| PDL1 CPS |  |  |  | - | - |
| ≥10 |  |  |  |  |  |
| <10 | 0.736 (0.335-1.616) | 0.445 |  |  |  |
| Paclitaxel type |  |  |  | - | - |
| Albumin Bound |  |  |  |  |  |
| Solvent-Based | 0.694 (0.379-1.270) | 0.236 |  |  |  |
| Smoking |  |  |  | - | - |
| YES |  |  |  |  |  |
| NO | 1.386 (0.665–2.890) | 0.384 |  |  |  |
| Drinking |  |  |  | - | - |
| YES |  |  |  |  |  |
| NO | 1.207 (0.617–2.363) | 0.583 |  |  |  |
| Dysphagia score |  |  |  | - | - |
| 0-1 |  |  |  |  |  |
| 2-4 | 0.723 (0.341–1.534) | 0.398 |  |  |  |
| SCC |  |  |  | - | - |
| ≥ULN |  |  |  |  |  |
| <ULN | 0.804 (0.518–1.249) | 0.331 |  |  |  |
| LDH |  |  |  | - | - |
| ≥ULN |  |  |  |  |  |
| <ULN | 0.874 (0.389–1.961) | 0.743 |  |  |  |
| ALB |  |  |  | - | - |
| <ULN |  |  |  |  |  |
| ≥ULN | 0.813 (0.433–1.525) | 0.519 |  |  |  |

Univariate analysis uses the enter method, while multivariable analysis employs the Forward: LR method. Abbreviation: UT, Upper thoracic; MT, Middle thoracic; LT, Lowerthoracic; ULN, Upper Limit of Normal; SCC, Squamous Cell Carcinoma Antigen; ALB, Albumin; LDH, Lactate Dehydrogenase
